# Supplementary material for: Identification and validation of tissue or ctDNA PTPRD phosphatase domain deleterious mutations as prognostic and predictive biomarkers for immune checkpoint inhibitors in non-squamous NSCLC
Source: Springer Nature journal article supplement (doi:10.1186/s12916-021-02075-5), 2021-10-07

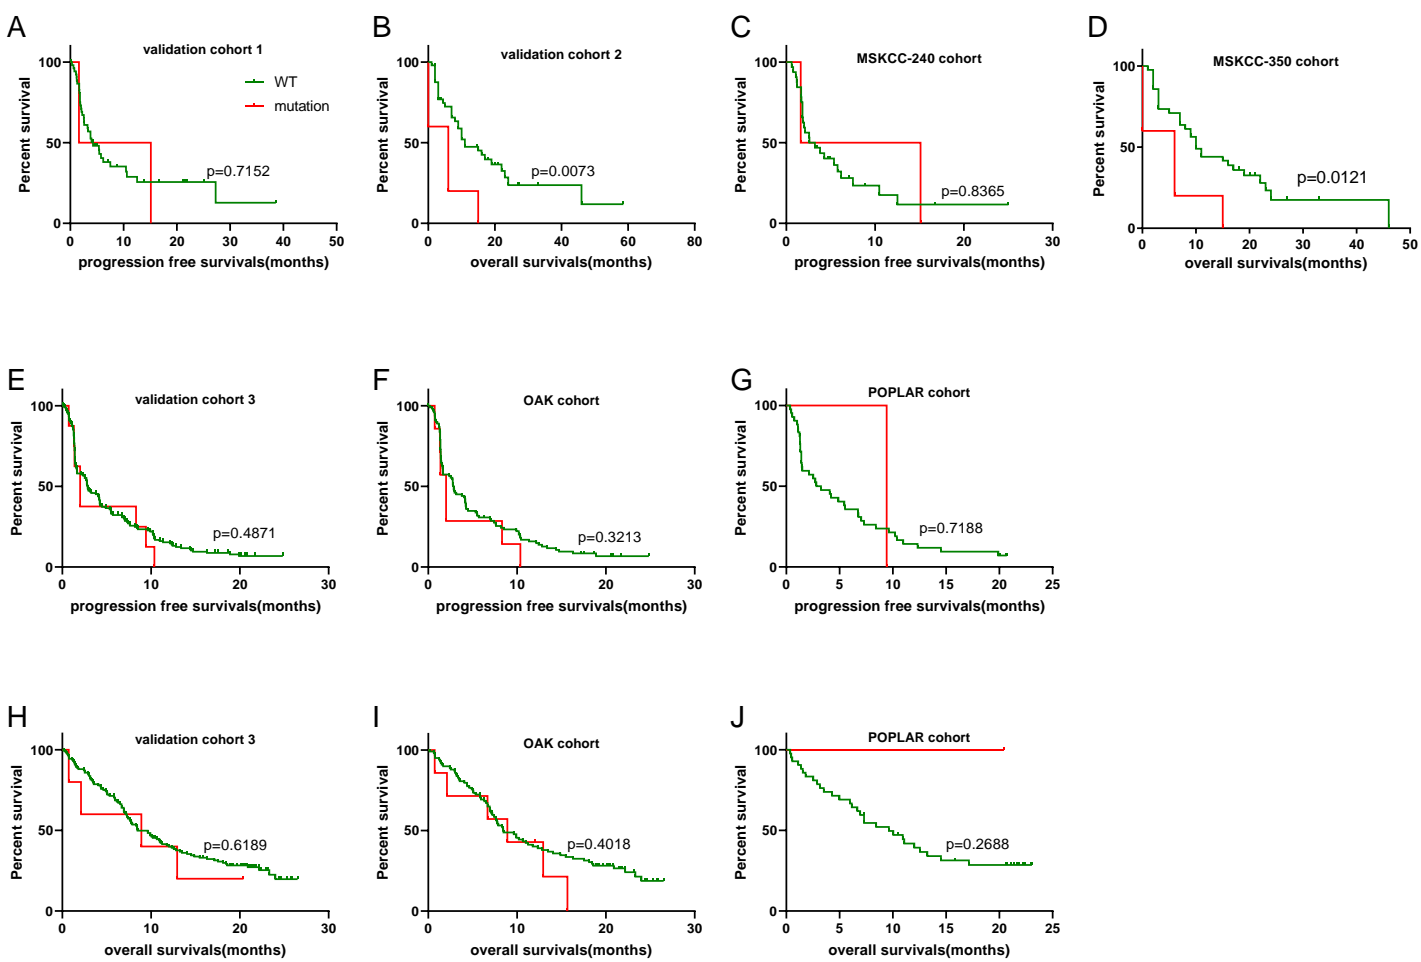

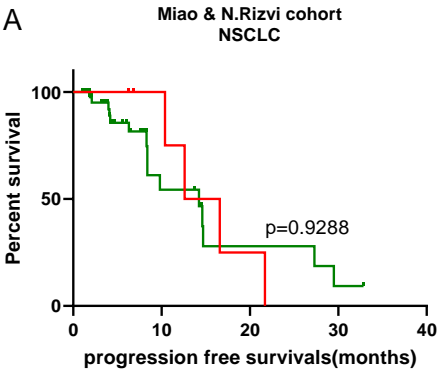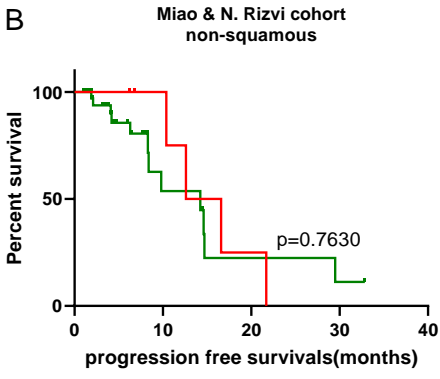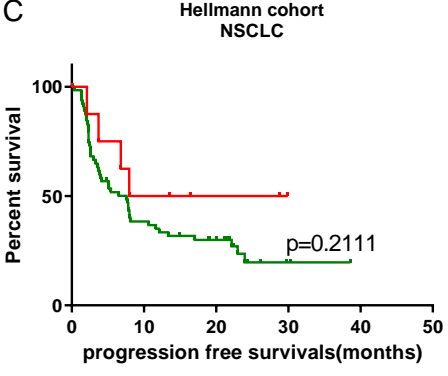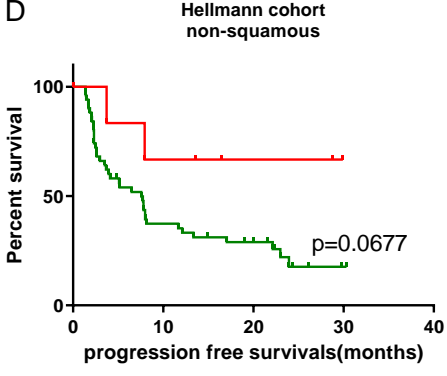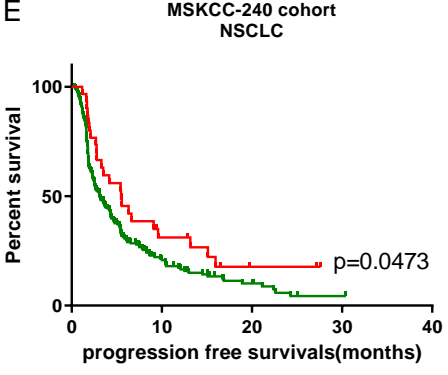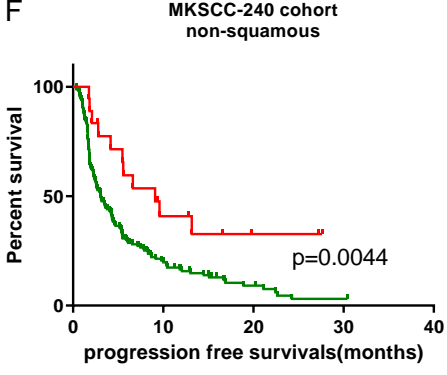

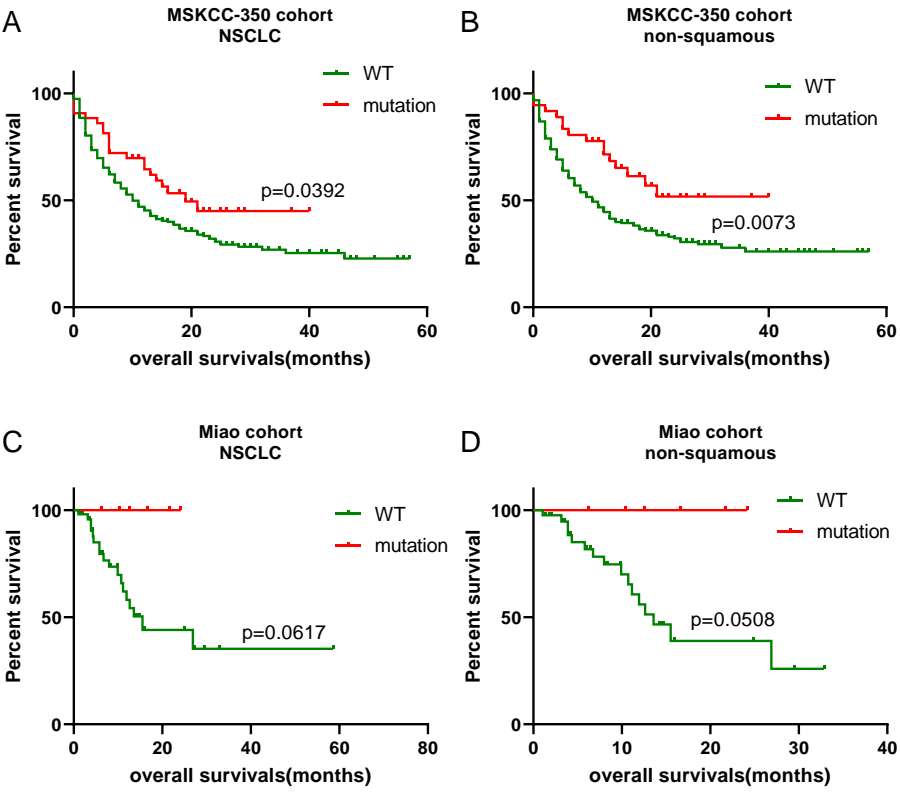

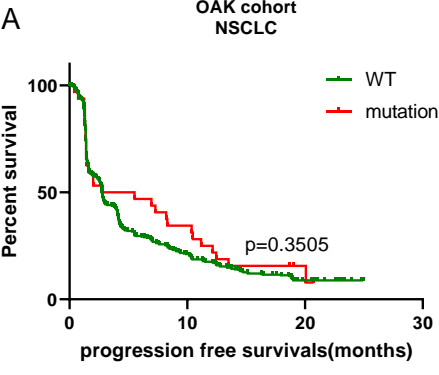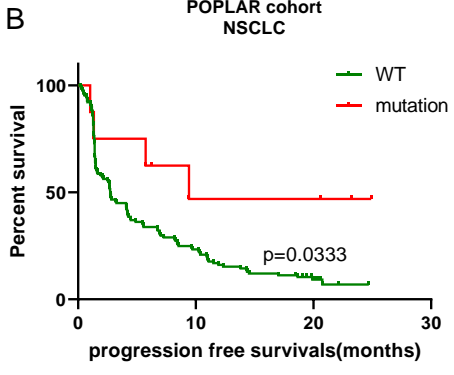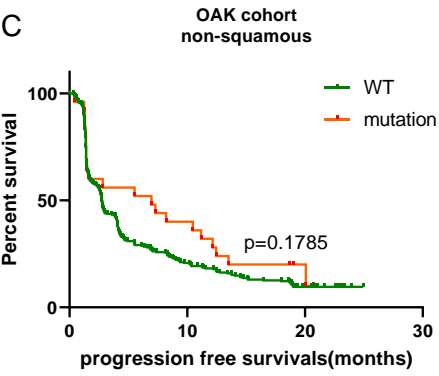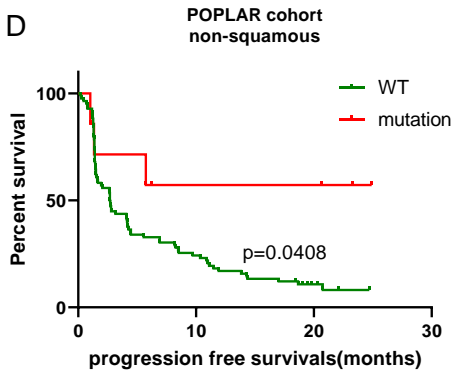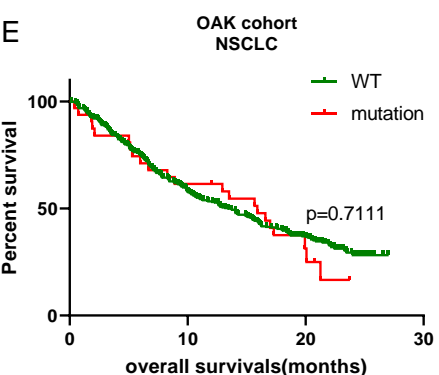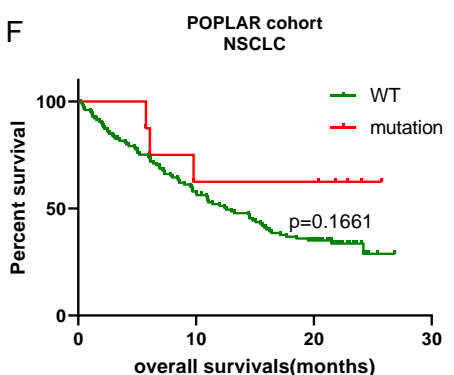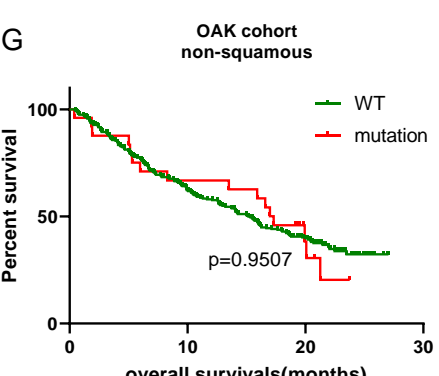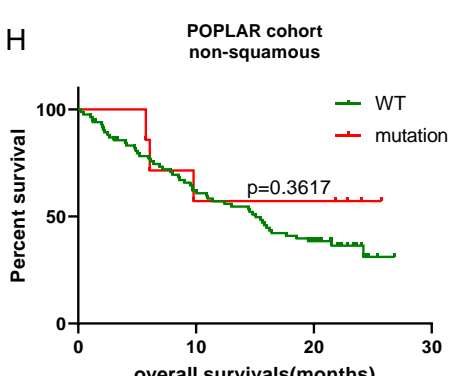

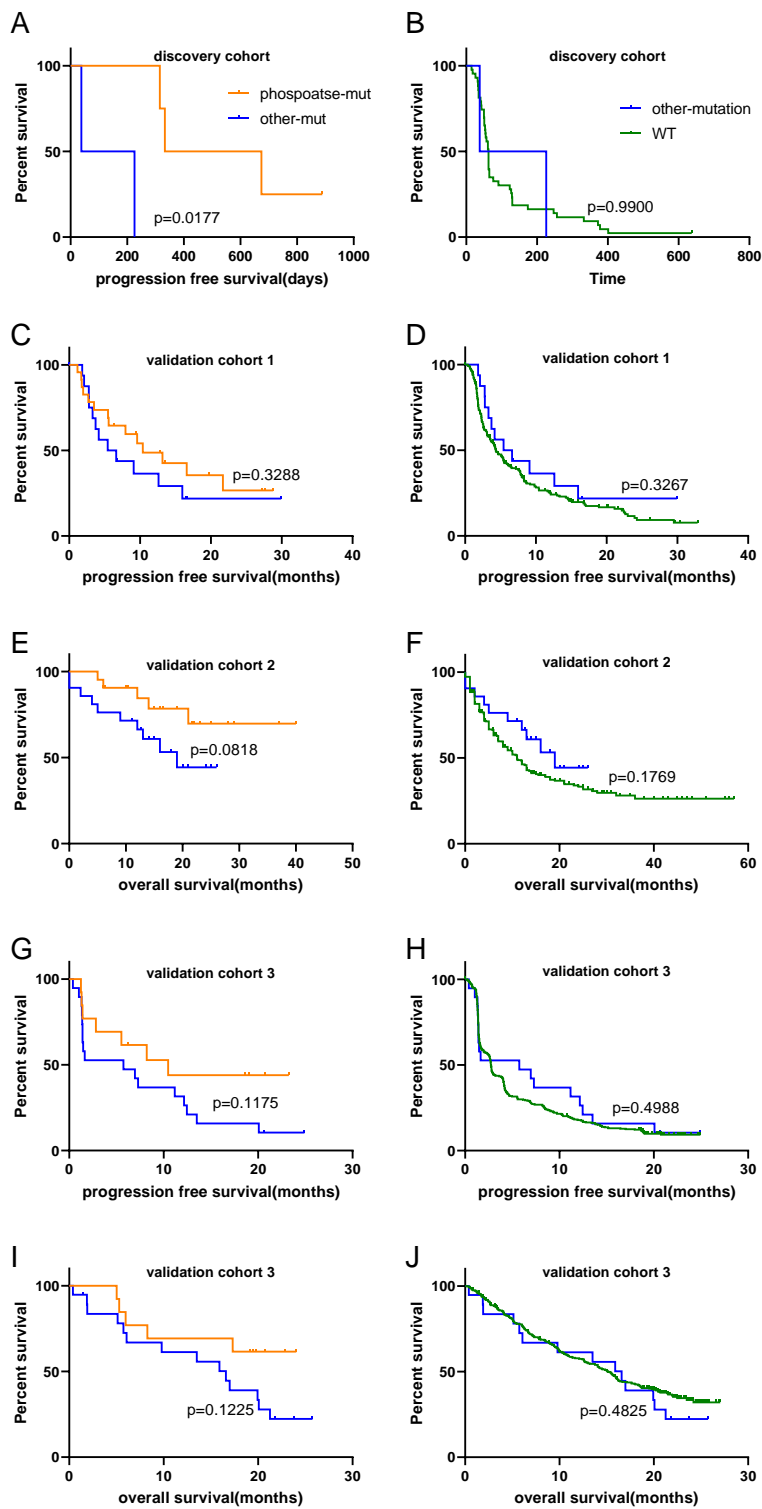

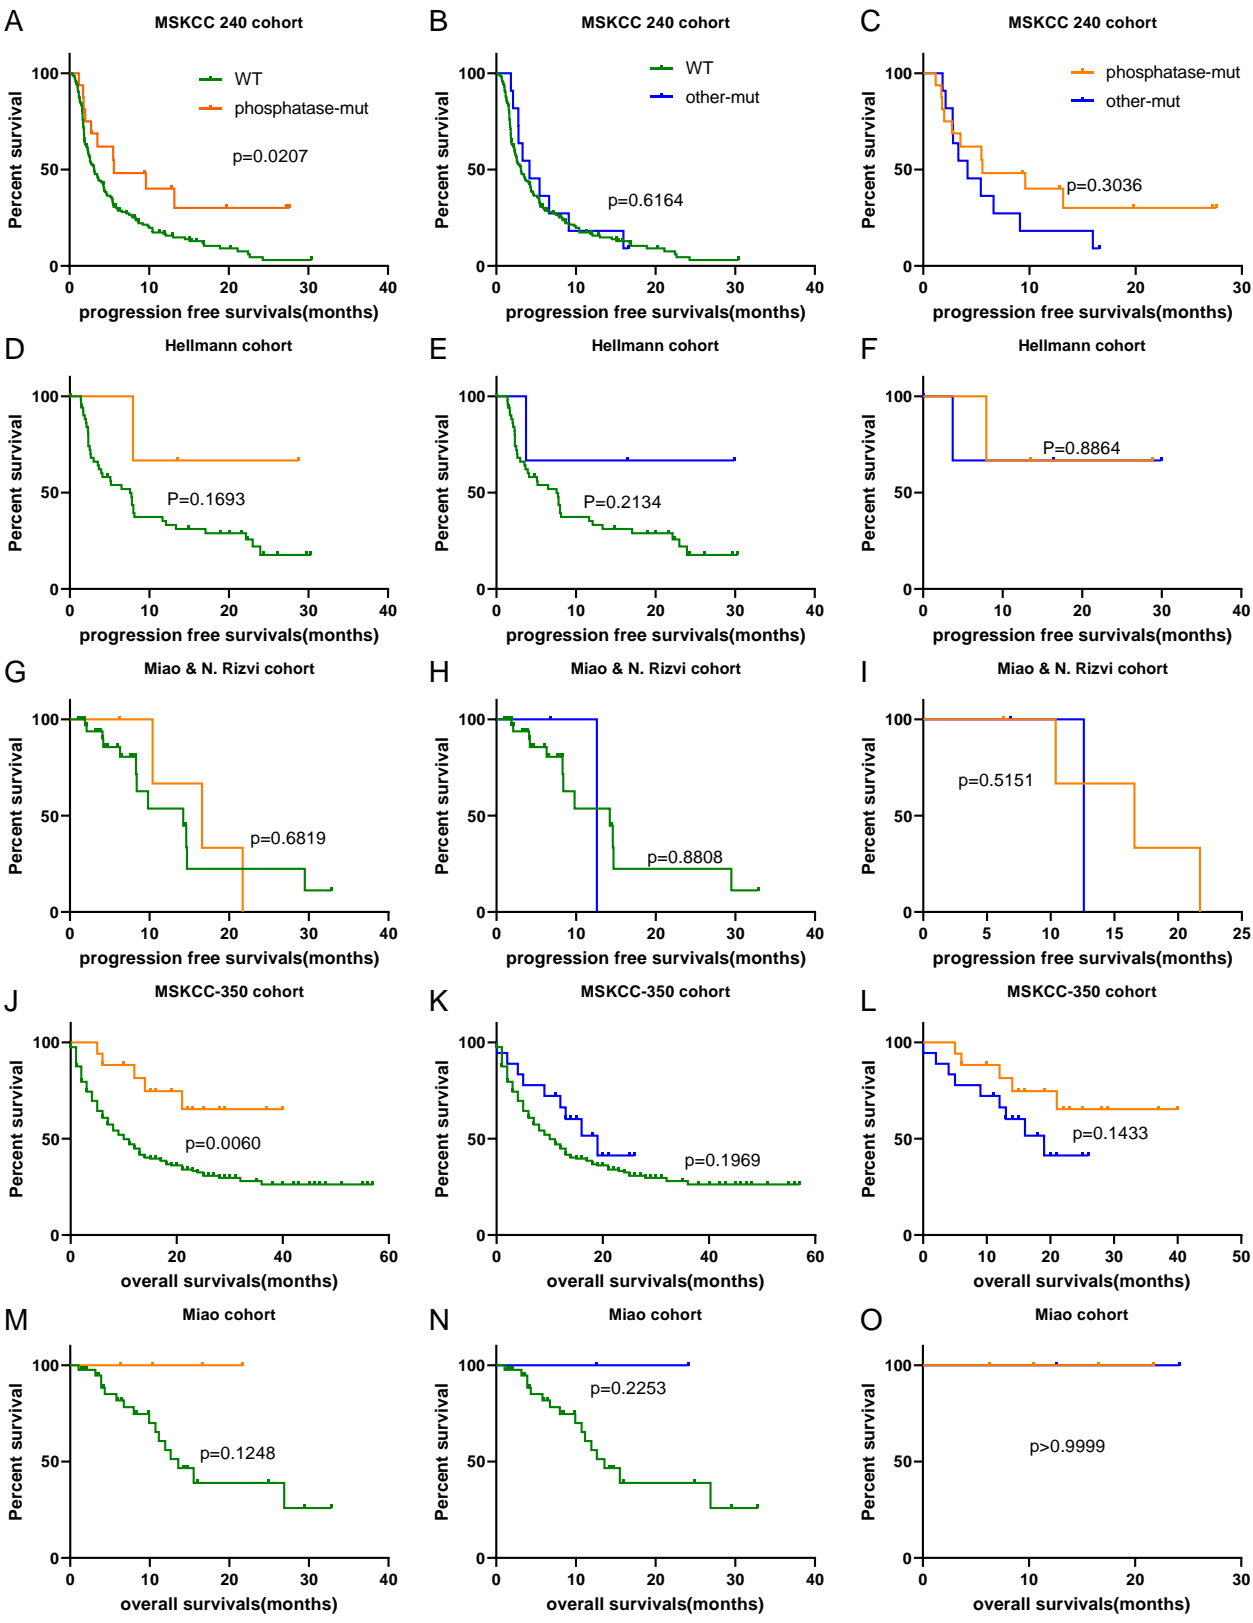

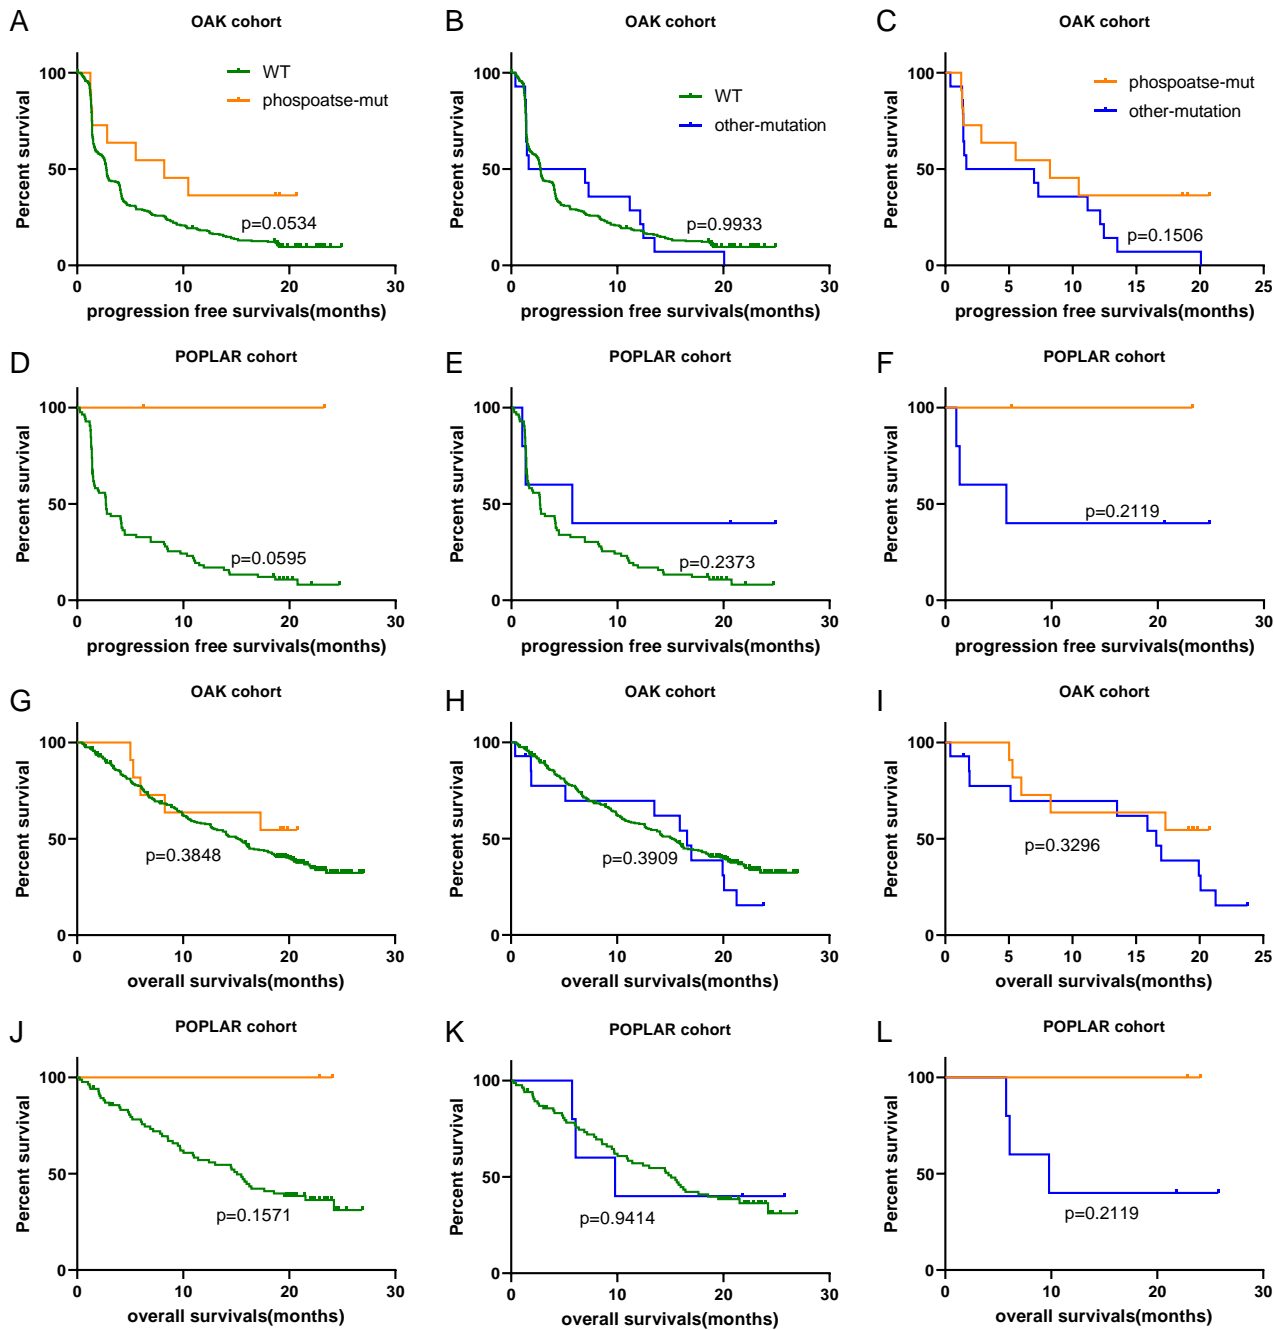

Additional file 2: Figure S8.

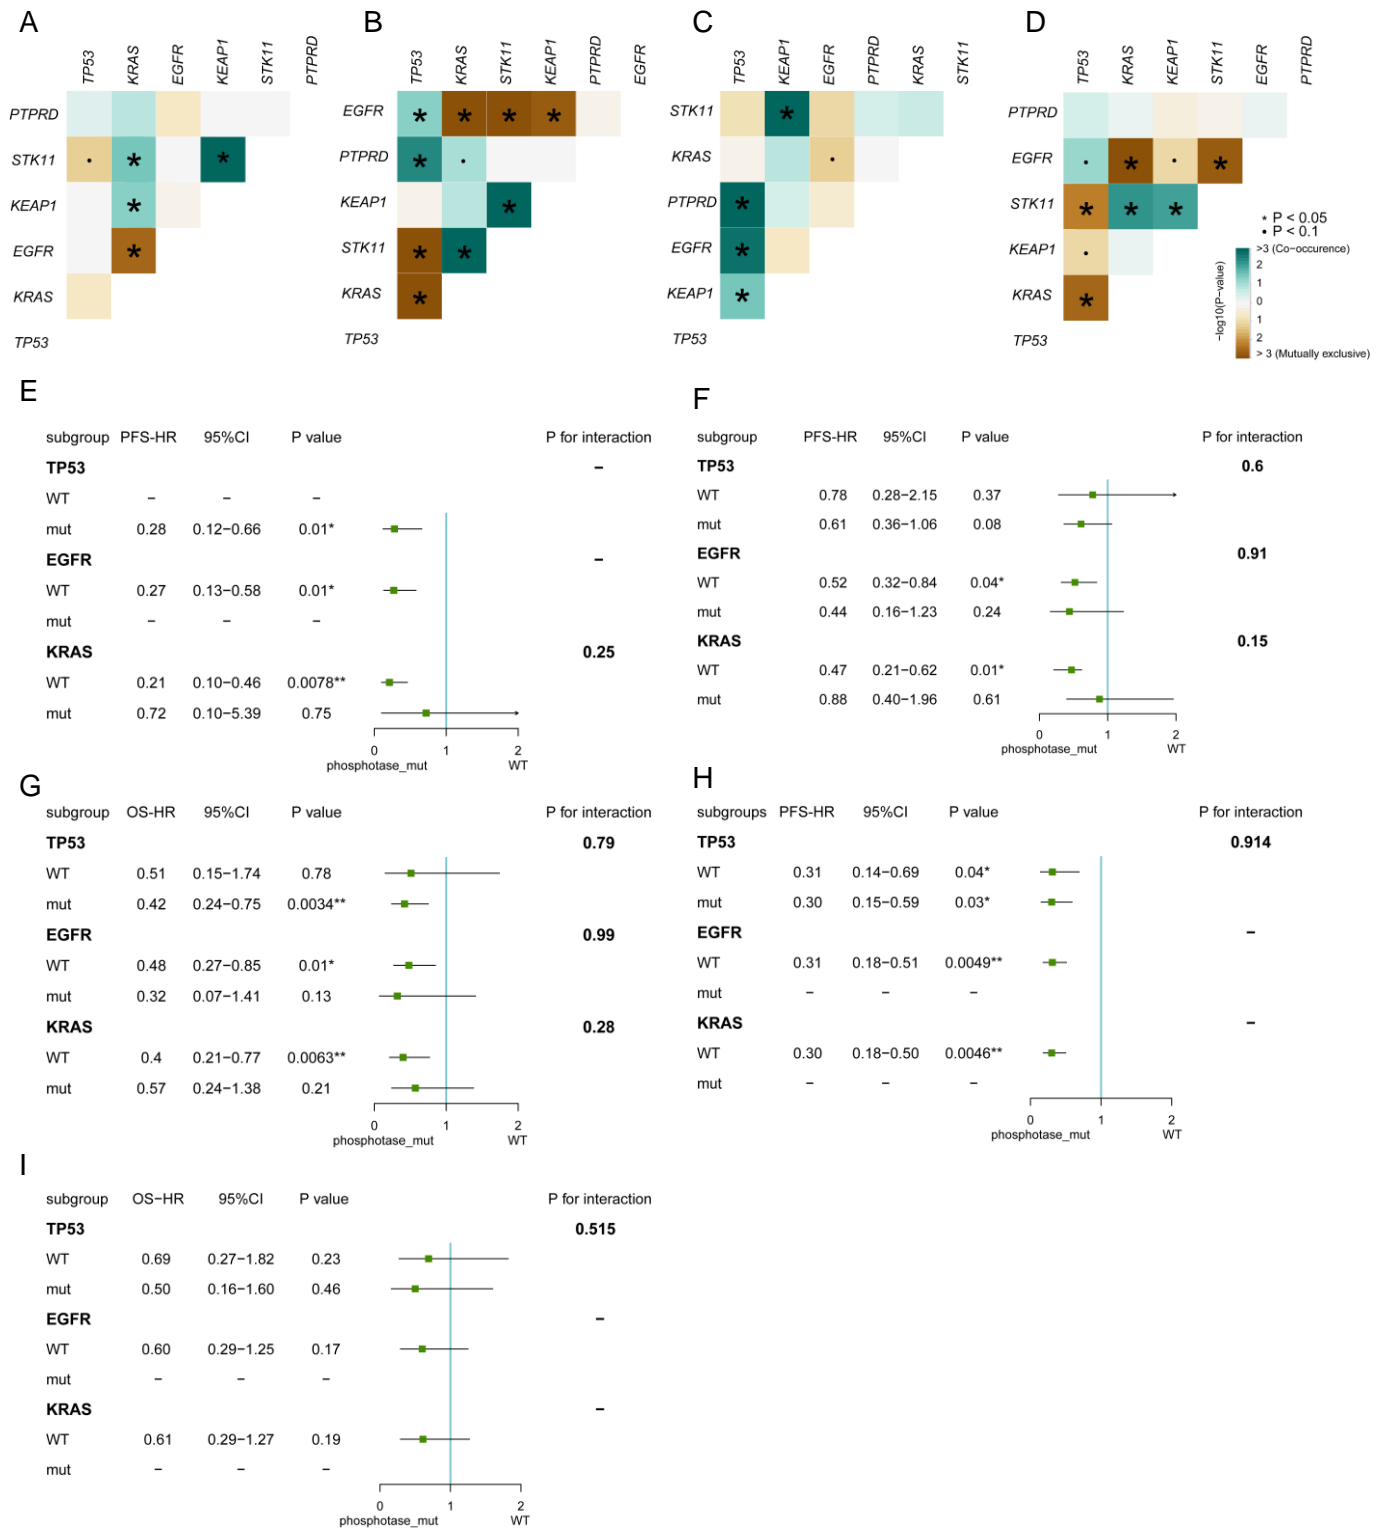



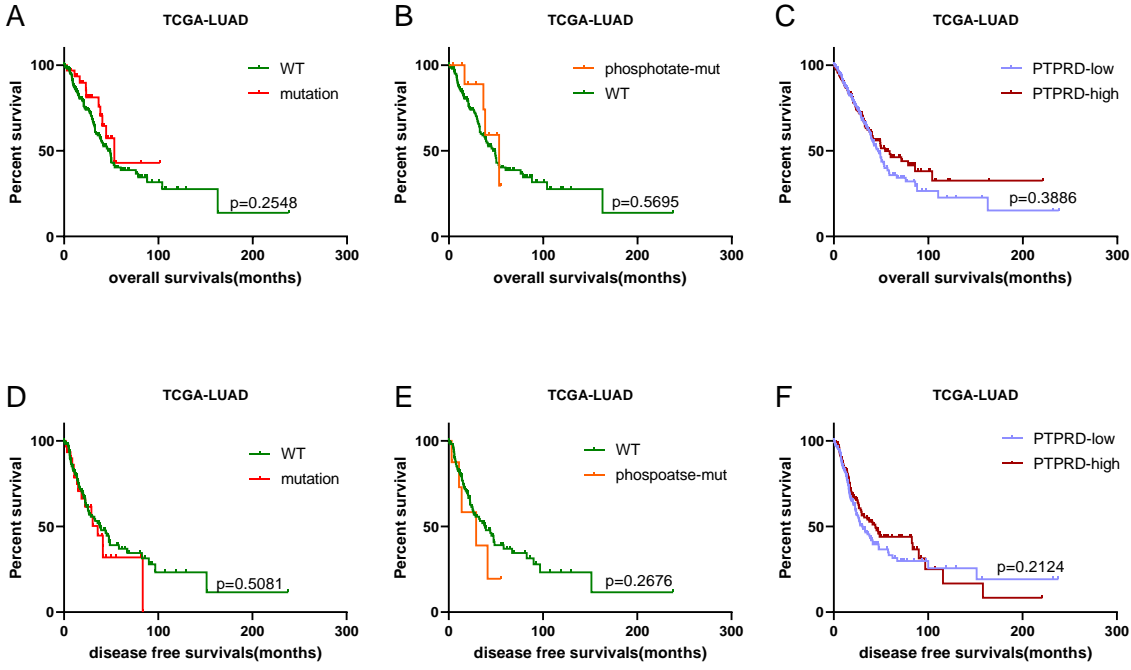

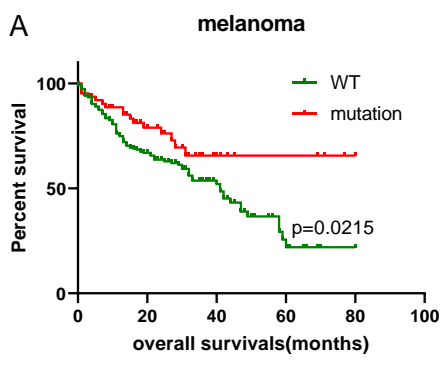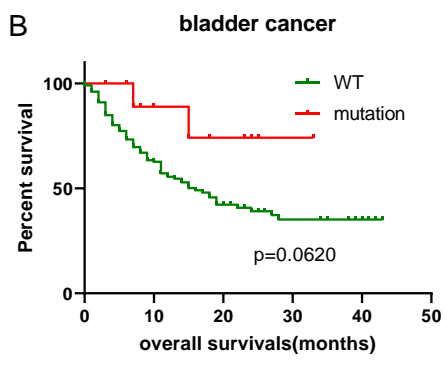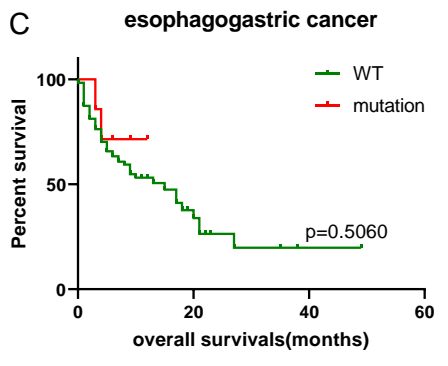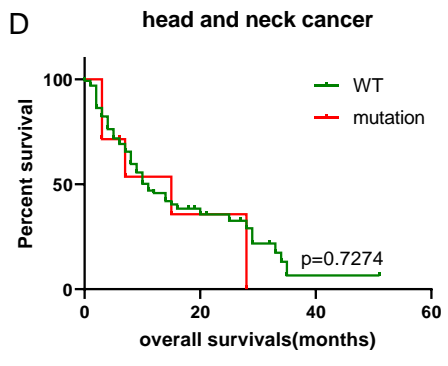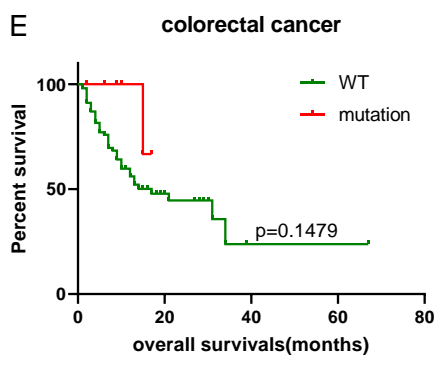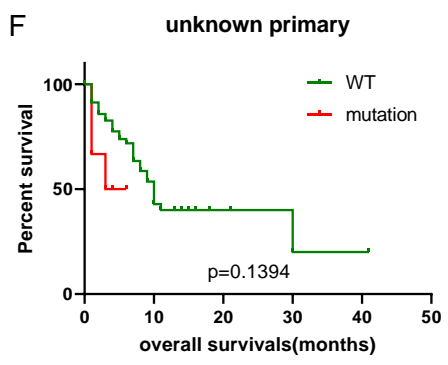

Supplement: MOESM2 [file 19737892]
