# Supplementary material for: Identification and validation of tissue or ctDNA PTPRD phosphatase domain deleterious mutations as prognostic and predictive biomarkers for immune checkpoint inhibitors in non-squamous NSCLC
Source: Springer Nature journal article supplement (doi:10.1186/s12916-021-02075-5), 2021-10-07
Supplement: MOESM1 [file 19737892]

# Additional file 1: Table S1.

| Characteristics              | No. | %     |
|------------------------------|-----|-------|
| No. of patients              | 73  | 100   |
| <b>Age</b>                   |     |       |
| ≥60                          | 25  | 34.25 |
| <60                          | 48  | 65.75 |
| <b>Gender</b>                |     |       |
| Female                       | 22  | 30.14 |
| Male                         | 51  | 69.86 |
| <b>Histology</b>             |     |       |
| Non-squamous                 | 49  | 67.12 |
| Squamous                     | 24  | 32.88 |
| <b>Smoking</b>               |     |       |
| Never                        | 37  | 50.68 |
| Ever                         | 6   | 8.22  |
| Current                      | 30  | 41.10 |
| <b>Ecog</b>                  |     |       |
| 0                            | 18  | 24.66 |
| 1                            | 55  | 75.34 |
| <b>Metastasis</b>            |     |       |
| Metastatic sites ≥3          | 26  | 35.62 |
| Metastatic sites <3          | 47  | 64.38 |
| <b>LDH</b>                   |     |       |
| ≥250 U/L                     | 34  | 46.58 |
| < 250 U/L                    | 39  | 53.42 |
| <b>Treatment</b>             |     |       |
| Anti-PD1                     | 54  | 73.97 |
| Anti-PD-L1                   | 19  | 19.00 |
| <b>Lines of therapy</b>      |     |       |
| Second                       | 39  | 53.42 |
| Third or subsequent          | 34  | 46.58 |
| <b>PD-L1 expression</b>      |     |       |
| < 1%                         | 35  | 47.95 |
| 1-49%                        | 11  | 15.07 |
| >50%                         | 3   | 4.11  |
| unknown                      | 23  | 31.51 |
| <b>Best overall response</b> |     |       |
| CR                           | 1   | 1.37  |
| PR                           | 13  | 17.81 |
| SD                           | 19  | 26.03 |
| PD                           | 40  | 54.79 |
| <b>Driver mutation</b>       |     |       |
| EGFR                         | 9   | 12.33 |
| KRAS                         | 7   | 9.59  |
| TP53                         | 36  | 49.32 |
| <b>TMB</b>                   |     |       |
| ≥10                          | 18  | 24.66 |
| < 10                         | 55  | 75.34 |

Additional file 1: Table S2.Details of 8 NSCLC cohorts analyzed in this study.

| cohort    | cases | sequencing            | source | drugs                        | PFS | OS  | responses |
|-----------|-------|-----------------------|--------|------------------------------|-----|-----|-----------|
| NCC       | 73    | WES                   | tissue | anti-PD-(L)1                 | yes | NA  | ORR       |
| N.Rizvi   | 34*   | WES                   | tissue | anti-PD-1                    | yes | NA  | ORR       |
| Miao      | 56    | WES                   | tissue | anti-PD-(L)1<br>+anti-CTLA-4 | yes | yes | ORR       |
| Hellmann  | 75    | WES                   | tissue | anti-PD-(L)1<br>+anti-CTLA-4 | yes | NA  | ORR       |
| MSKCC-240 | 240   | IMAPCT<br>341/410/468 | tissue | anti-PD-(L)1                 | yes | NA  | DCB       |
| MSKCC-350 | 350   | IMPACT<br>341/410/468 | tissue | anti-PD-(L)1                 | NA  | yes | NA        |
| OAK       | 408   | Foundation One        | ctDNA  | anti-PD-L1                   | yes | yes | ORR       |
| POPLAR    | 134   | Foundation One        | ctDNA  | anti-PD-L1                   | yes | yes | ORR       |

Note: 28 patients with PFS data were shared by N.Rizvi cohort and Miao cohort. Hence, when analyzing PFS, these 2 cohorts were merged as Miao & N.Rizvi cohort. Besides, MSKCC-240 and MSKCC-350 also shared some patients, but MSKCC-240 cohort only contained PFS data while MSKCC-350 only contained PFS data. So, MSKCC-240 and MSKCC-350 cohort were still analyzed separately.

Additional file 1: Table S3.

| Variant               | PROVEAN score | Prediction  | Variant          | PROVEAN score | Prediction  | Variant           | PROVEAN score | Prediction  |
|-----------------------|---------------|-------------|------------------|---------------|-------------|-------------------|---------------|-------------|
| discovery cohort      |               |             | MSKCC-350 cohort |               |             | OAK&POPLAR cohort |               |             |
| V115I                 | -0.506        | Neutral     | Y551F            | -1.808        | Neutral     | D32Y              | -5.911        | Deleterious |
| R1798Q                | -3.485        | Deleterious | V635L            | -0.505        | Neutral     | A143T             | -2.678        | Deleterious |
| R1730L                | -6.204        | Deleterious | V1686L           | -2.765        | Deleterious | A1664D            | -5.526        | Deleterious |
| R141H                 | -2.427        | Neutral     | V1063L           | -2.299        | Neutral     | A996P             | -3.878        | Deleterious |
| Hellmann cohort       |               |             | T706K            | -4.103        | Deleterious | S896L             | -2.696        | Deleterious |
| K909N                 | -2.3          | Neutral     | T376R            | -4.262        | Deleterious | Q1422P            | -5.524        | Deleterious |
| P867T                 | -1.892        | Neutral     | T1738S           | -3.556        | Deleterious | P986Q             | -4.309        | Deleterious |
| L674F                 | -2.249        | Neutral     | T1100K           | -2.717        | Deleterious | T834I             | -3.678        | Deleterious |
| G920V                 | -6.228        | Deleterious | S896L            | -2.696        | Deleterious | S1244C            | -4.754        | Deleterious |
| H1345N                | -3.606        | Deleterious | S667L            | -1.218        | Neutral     | R141H             | -2.427        | Neutral     |
| P1257L                | -6.024        | Deleterious | Y1191C           | -8.505        | Deleterious | A1133S            | 0.95          | Neutral     |
| M1731I                | -3.371        | Deleterious | S1252Q           | -1.304        | Neutral     | L1014Q            | -1.379        | Neutral     |
| Miao & N.Rizvi cohort |               |             | R6M              | -0.045        | Neutral     | A213P             | -2.935        | Deleterious |
| G1057V                | -2.143        | Neutral     | R1674S           | -5.5          | Deleterious | H660Y             | -1.741        | Neutral     |
| A773P                 | -2.086        | Neutral     | R1536H           | -4.39         | Deleterious | V736L             | -0.288        | Neutral     |
| T487K                 | -4.966        | Deleterious | Q425K            | -2.461        | Neutral     | G1094V            | -7.167        | Deleterious |
| R1674C                | -7.378        | Deleterious | Q485K            | -0.788        | Neutral     | A1846S            | -2.706        | Deleterious |
| R1793S                | -5.147        | Deleterious | P519T            | -6.669        | Deleterious | C45F              | -8.014        | Deleterious |
| C1562Y                | -9.964        | Deleterious | P1839R           | -7.831        | Deleterious | R237T             | -4.488        | Deleterious |
| MSKCC-240 cohort      |               |             | P1525T           | -7.215        | Deleterious | E1062V            | -2.76         | Deleterious |
| S1252Q                | -1.304        | Neutral     | P1520T           | -7.237        | Deleterious | R1323L            | -6.333        | Deleterious |
| E138Q                 | -2.208        | Neutral     | M282I            | -3.258        | Deleterious | F1534V            | -6.362        | Deleterious |
| F850L                 | -0.116        | Neutral     | M1864K           | -5.418        | Deleterious | A1533D            | -3.916        | Deleterious |
| T930N                 | -0.305        | Neutral     | L984F            | -3.029        | Deleterious | R561Q             | -0.721        | Neutral     |
| T869N                 | -1.061        | Neutral     | L673V            | -0.204        | Neutral     | G920V             | -6.228        | Deleterious |
| V1063L                | -2.299        | Neutral     | L1349F           | -3.564        | Deleterious | G272R             | -6.694        | Deleterious |
| V1686L                | -2.765        | Deleterious | G761C            | -5.375        | Deleterious | D281H             | -4.049        | Deleterious |
| A1413D                | -5.389        | Deleterious | G1835A           | -5.231        | Deleterious | T342K             | -4.396        | Deleterious |
| G1835A                | -5.231        | Deleterious | G1825R           | -6.962        | Deleterious | Y1910N            | -7.204        | Deleterious |
| P1520T                | -7.237        | Deleterious | G1418W           | -7.543        | Deleterious | R1559G            | -6.328        | Deleterious |
| P519T                 | -6.669        | Deleterious | G1213E           | -5.408        | Deleterious | R1496L            | -6.312        | Deleterious |
| P1338T                | -5.937        | Deleterious | G1152V           | -5.979        | Deleterious | D1600E            | -3.146        | Deleterious |
| G1418W                | -7.543        | Deleterious | F850L            | -0.116        | Neutral     | W1729L            | -11.516       | Deleterious |
| G1152V                | -5.979        | Deleterious | E698Q            | -1.418        | Neutral     | R1177C            | -4.158        | Deleterious |
| G1152V                | -5.979        | Deleterious | E21Q             | -1.064        | Neutral     | P609S             | -4.047        | Deleterious |
| T1100K                | -2.717        | Deleterious | E1761V           | -5.968        | Deleterious | G514A             | -5.155        | Deleterious |
| D473V                 | -5.021        | Deleterious | E118K            | -2.545        | Deleterious | A1846S            | -2.706        | Deleterious |
| G761C                 | -5.375        | Deleterious | D473Y            | -5.276        | Deleterious | S1303I            | -2.455        | Neutral     |
| A1899D                | -4.905        | Deleterious | D473V            | -5.021        | Deleterious | T1455K            | -5.657        | Deleterious |
| L1349F                | -3.564        | Deleterious | A1413D           | -5.389        | Deleterious | D1908Y            | -7.207        | Deleterious |
| R1674S                | -5.5          | Deleterious | TCGA-LUAD        |               | G1122C      | -6.35             | Deleterious   |             |
| M1864K                | -5.418        | Deleterious | A1101S           | -1.822        | Neutral     | R1496Q            | -3.502        | Deleterious |
| E118K                 | -2.545        | Deleterious | L1255M           | 0.15          | Neutral     | A336G             | -3.251        | Deleterious |
| V1389G                | -6.606        | Deleterious | E1078Q           | -0.825        | Neutral     | P326R             | -7.664        | Deleterious |
|                       |               |             | S1179T           | -1.557        | Neutral     | G382V             | -7.206        | Deleterious |
|                       |               |             | S1299T           | -1.011        | Neutral     | C1615F            | -9.295        | Deleterious |
|                       |               |             | Y1182F           | -1.476        | Neutral     | N1023I            | -7.261        | Deleterious |
|                       |               |             | E915D            | -2.126        | Neutral     | K439N             | -1.378        | Neutral     |
|                       |               |             | A381S            | -0.321        | Neutral     | Q193K             | -3.082        | Deleterious |
|                       |               |             | L790I            | -1.568        | Neutral     | C1615F            | -9.295        | Deleterious |
|                       |               |             | Q67E             | -1.803        | Neutral     | R857L             | -5.06         | Deleterious |
|                       |               |             | R123S            | 0.793         | Neutral     | P403L             | -7.801        | Deleterious |
|                       |               |             | A1846T           | -3.611        | Deleterious | Q1018K            | -1.811        | Neutral     |
|                       |               |             | G1638A           | -4.797        | Deleterious | H660Y             | -1.741        | Neutral     |
|                       |               |             | L1532V           | -2.643        | Deleterious | T1483R            | -5.235        | Deleterious |
|                       |               |             | A100D            | -4.411        | Deleterious | S1395C            | -4.403        | Deleterious |
|                       |               |             | Q1718H           | -4.416        | Deleterious | P1839A            | -6.969        | Deleterious |
|                       |               |             | R1730W           | -7.082        | Deleterious | S182C             | -0.29         | Neutral     |
|                       |               |             | D1344N           | -2.672        | Deleterious | E1786G            | -6.006        | Deleterious |
|                       |               |             | W1038R           | -12.688       | Deleterious | T706N             | -3.439        | Deleterious |
|                       |               |             | P1249T           | -4.48         | Deleterious | D154Y             | -6.188        | Deleterious |
|                       |               |             | P1318T           | -7.342        | Deleterious | T477S             | -3.054        | Deleterious |
|                       |               |             | R1181P           | -4.625        | Deleterious | R684L             | -2.879        | Deleterious |
|                       |               |             | D500Y            | -7.173        | Deleterious | P1530L            | -8.563        | Deleterious |
|                       |               |             | D275N            | -3.694        | Deleterious | E21K              | -1.259        | Neutral     |
|                       |               |             | L925H            | -4.777        | Deleterious | T988N             | -3.667        | Deleterious |
|                       |               |             | Q316R            | -3.255        | Deleterious | M1731I            | -3.371        | Deleterious |
|                       |               |             | R174L            | -4.783        | Deleterious | F1011L            | -1.187        | Neutral     |
|                       |               |             | R733H            | -2.987        | Deleterious | G789V             | -4.204        | Deleterious |
|                       |               |             | S180K            | -2.71         | Deleterious | L1255Q            | -1.163        | Neutral     |
|                       |               |             | T804K            | -4.775        | Deleterious | P1433S            | -6.285        | Deleterious |
|                       |               |             | Y488D            | -8.824        | Deleterious | P759R             | -2.723        | Deleterious |
|                       |               |             |                  |               | D371H       | -4.309            | Deleterious   |             |
|                       |               |             |                  |               | T158S       | -0.762            | Neutral       |             |
|                       |               |             |                  |               | L146F       | -2.86             | Deleterious   |             |
|                       |               |             |                  |               | S504L       | -5.161            | Deleterious   |             |
|                       |               |             |                  |               | S504T       | -2.614            | Deleterious   |             |
|                       |               |             |                  |               | S927L       | -0.256            | Neutral       |             |
|                       |               |             |                  |               | Q1368E      | -2.823            | Deleterious   |             |
|                       |               |             |                  |               | T301P       | -5.151            | Deleterious   |             |
|                       |               |             |                  |               | L435V       | -0.91             | Neutral       |             |
|                       |               |             |                  |               | A426E       | -4.054            | Deleterious   |             |
|                       |               |             |                  |               | E1902V      | -5.795            | Deleterious   |             |
|                       |               |             |                  |               | P421L       | -8.8              | Deleterious   |             |
|                       |               |             |                  |               | A1295V      | -1.558            | Neutral       |             |
|                       |               |             |                  |               | P792A       | -5.396            | Deleterious   |             |

Additional file 1: Table S4.

| NAME                                       | SIZE | ES     | NES    | NOM     | FDR     | FWER    |
|--------------------------------------------|------|--------|--------|---------|---------|---------|
|                                            |      |        |        | p-value | q-value | p-value |
| HALLMARK_UV_RESPONSE_DN                    | 134  | -0.424 | -1.359 | 0.031   | 0.376   | 0.469   |
| HALLMARK_HEDGEHOG_SIGNALING                | 34   | -0.476 | -1.421 | 0.047   | 0.432   | 0.339   |
| HALLMARK_EPITHELIAL_MESENCHYMAL_TRANSITION | 194  | -0.565 | -1.273 | 0.092   | 0.522   | 0.601   |
| HALLMARK_MYOGENESIS                        | 199  | -0.323 | -1.264 | 0.094   | 0.420   | 0.616   |
| HALLMARK_INTERFERON_ALPHA_RESPONSE         | 90   | 0.501  | 1.405  | 0.113   | 0.663   | 0.349   |
| HALLMARK_OXIDATIVE_PHOSPHORYLATION         | 179  | 0.530  | 1.260  | 0.129   | 1.000   | 0.597   |
| HALLMARK_REACTIVE_OXYGEN_SPECIES_PATHWAY   | 45   | -0.474 | -1.163 | 0.209   | 0.684   | 0.696   |
| HALLMARK_KRAS_SIGNALING_DN                 | 188  | 0.172  | 1.130  | 0.218   | 1.000   | 0.716   |
| HALLMARK_PANCREAS_BETA_CELLS               | 38   | 0.346  | 1.210  | 0.228   | 1.000   | 0.651   |
| HALLMARK_PEROXISOME                        | 100  | 0.309  | 1.099  | 0.268   | 0.901   | 0.750   |
| HALLMARK_MYC_TARGETS_V2                    | 57   | 0.418  | 1.177  | 0.274   | 0.996   | 0.679   |
| HALLMARK_DNA_REPAIR                        | 138  | 0.387  | 1.128  | 0.284   | 0.896   | 0.718   |
| HALLMARK_MITOTIC_SPINDLE                   | 194  | -0.297 | -1.118 | 0.346   | 0.742   | 0.733   |
| HALLMARK_INTERFERON_GAMMA_RESPONSE         | 190  | 0.356  | 1.083  | 0.374   | 0.856   | 0.768   |
| HALLMARK_IL6_JAK_STAT3_SIGNALING           | 86   | 0.391  | 1.063  | 0.381   | 0.841   | 0.789   |
| HALLMARK_SPERMATOGENESIS                   | 130  | 0.144  | 1.024  | 0.415   | 0.899   | 0.827   |
| HALLMARK_XENOBIOTIC_METABOLISM             | 198  | -0.280 | -1.027 | 0.422   | 0.995   | 0.811   |
| HALLMARK_MYC_TARGETS_V1                    | 189  | 0.478  | 1.010  | 0.464   | 0.873   | 0.838   |
| HALLMARK_PROTEIN_SECRETION                 | 95   | -0.338 | -1.002 | 0.469   | 0.972   | 0.834   |
| HALLMARK_E2F_TARGETS                       | 186  | 0.345  | 0.963  | 0.507   | 0.893   | 0.874   |
| HALLMARK_ANGIOGENESIS                      | 36   | -0.416 | -0.976 | 0.525   | 0.960   | 0.863   |
| HALLMARK_ALLOGRAFT_REJECTION               | 189  | 0.340  | 0.975  | 0.530   | 0.921   | 0.863   |
| HALLMARK_HYPOXIA                           | 188  | -0.329 | -0.974 | 0.538   | 0.871   | 0.863   |
| HALLMARK_HEME_METABOLISM                   | 187  | -0.198 | -0.945 | 0.592   | 0.890   | 0.887   |
| HALLMARK_TNFA_SIGNALING_VIA_NFKB           | 194  | 0.339  | 0.913  | 0.632   | 0.773   | 0.912   |
| HALLMARK_UV_RESPONSE_UP                    | 152  | 0.341  | 0.944  | 0.640   | 0.890   | 0.884   |
| HALLMARK_PI3K_AKT_MTOR_SIGNALING           | 101  | 0.289  | 0.929  | 0.642   | 0.822   | 0.901   |
| HALLMARK_ADIPOGENESIS                      | 185  | 0.267  | 0.925  | 0.654   | 0.786   | 0.905   |
| HALLMARK_COMPLEMENT                        | 193  | 0.268  | 0.898  | 0.656   | 0.771   | 0.918   |
| HALLMARK_ESTROGEN_RESPONSE_LATE            | 196  | 0.298  | 0.938  | 0.683   | 0.852   | 0.895   |
| HALLMARK_APICAL_JUNCTION                   | 193  | -0.263 | -0.879 | 0.702   | 1.000   | 0.922   |
| HALLMARK_P53_PATHWAY                       | 193  | 0.277  | 0.896  | 0.720   | 0.737   | 0.918   |
| HALLMARK_CHOLESTEROL_HOMEOSTASIS           | 73   | -0.297 | -0.855 | 0.738   | 0.947   | 0.940   |
| HALLMARK_COAGULATION                       | 136  | -0.260 | -0.861 | 0.759   | 0.999   | 0.936   |
| HALLMARK_TGF_BETA_SIGNALING                | 54   | -0.306 | -0.837 | 0.764   | 0.876   | 0.951   |
| HALLMARK_FATTY_ACID_METABOLISM             | 155  | -0.260 | -0.837 | 0.794   | 0.934   | 0.951   |
| HALLMARK_G2M_CHECKPOINT                    | 183  | 0.281  | 0.721  | 0.835   | 0.952   | 0.992   |
| HALLMARK_NOTCH_SIGNALING                   | 32   | 0.263  | 0.794  | 0.842   | 0.967   | 0.970   |
| HALLMARK_GLYCOLYSIS                        | 192  | -0.249 | -0.810 | 0.860   | 0.895   | 0.961   |
| HALLMARK_ESTROGEN_RESPONSE_EARLY           | 190  | -0.216 | -0.806 | 0.863   | 0.855   | 0.961   |
| HALLMARK_IL2_STAT5_SIGNALING               | 190  | -0.207 | -0.786 | 0.864   | 0.859   | 0.967   |
| HALLMARK_UNFOLDED_PROTEIN_RESPONSE         | 108  | 0.257  | 0.791  | 0.877   | 0.933   | 0.973   |
| HALLMARK_MTORC1_SIGNALING                  | 194  | -0.306 | -0.769 | 0.882   | 0.853   | 0.973   |
| HALLMARK_BILE_ACID_METABOLISM              | 112  | 0.139  | 0.781  | 0.885   | 0.919   | 0.979   |
| HALLMARK_APICAL_SURFACE                    | 42   | 0.168  | 0.762  | 0.896   | 0.930   | 0.986   |
| HALLMARK_WNT_BETA_CATENIN_SIGNALING        | 42   | -0.243 | -0.721 | 0.917   | 0.871   | 0.985   |
| HALLMARK_ANDROGEN_RESPONSE                 | 95   | -0.240 | -0.764 | 0.922   | 0.823   | 0.974   |
| HALLMARK_INFLAMMATORY_RESPONSE             | 197  | 0.229  | 0.719  | 0.923   | 0.918   | 0.992   |
| HALLMARK_KRAS_SIGNALING_UP                 | 194  | 0.193  | 0.711  | 0.980   | 0.899   | 0.992   |
| HALLMARK_APOPTOSIS                         | 159  | 0.291  | 0.758  | 0.982   | 0.903   | 0.986   |
| KEGG_TGF_BETA_SIGNALING_PATHWAY            | 85   | -0.243 | -0.786 | 0.873   | 0.931   | 1.000   |
| KEGG_WNT_SIGNALING_PATHWAY                 | 149  | -0.221 | -0.905 | 0.639   | 0.937   | 1.000   |
| KEGG_VEGF_SIGNALING_PATHWAY                | 74   | 0.220  | 0.841  | 0.746   | 1.000   | 1.000   |
